# Supplementary material
Source: ML conference proceedings conference paper supplement (https://proceedings.mlr.press/v80/xie18b.html)
Supplement: Supplementary file 1 [file xie18b-supp.pdf]

# Nonoverlap-Promoting Variable Selection

## – Supplementary Material

Pengtao Xie<sup>†\*</sup>, Hongbao Zhang<sup>\*</sup>, Yichen Zhu<sup>§</sup> and Eric P. Xing<sup>†</sup>

<sup>†</sup>Petuum Inc, USA

<sup>\*</sup>School of Computer Science, Carnegie Mellon University, USA

<sup>§</sup>School of Mathematical Sciences, Peking University, China

### 1 Coordinate Descent Algorithm for Learning $\mathbf{W}$

In each iteration of the CD algorithm, one basis vector is chosen for update while the others are fixed. Without loss of generality, we assume it is  $\mathbf{w}_1$ . The sub-problem defined over  $\mathbf{w}_1$  is

$$\min_{\mathbf{w}_1} \frac{1}{2} \sum_{i=1}^n \|\mathbf{x}_i - \sum_{l=2}^m a_{il} \mathbf{w}_l - a_{i1} \mathbf{w}_1\|_2^2 + \frac{\lambda_2 + \lambda_3}{2} \|\mathbf{w}_1\|_2^2 - \frac{\lambda_3}{2} \log \det(\mathbf{W}^\top \mathbf{W}) + \mathbf{u}^\top \mathbf{w}_1 + \frac{\rho}{2} \|\mathbf{w}_1 - \tilde{\mathbf{w}}_1\|_2^2 \quad (1)$$

To obtain the optimal solution, we take the derivative of the objective function and set it to zero. First, we discuss how to compute the derivative of  $\log \det(\mathbf{W}^\top \mathbf{W})$  w.r.t  $\mathbf{w}_1$ . According to the chain rule, we have

$$\frac{\partial \log \det(\mathbf{W}^\top \mathbf{W})}{\partial \mathbf{w}_1} = 2\mathbf{W}(\mathbf{W}^\top \mathbf{W})_{:,1}^{-1} \quad (2)$$

where  $(\mathbf{W}^\top \mathbf{W})_{:,1}^{-1}$  denotes the first column of  $(\mathbf{W}^\top \mathbf{W})^{-1}$ . Let  $\mathbf{W}_{-1} = [\mathbf{w}_2, \dots, \mathbf{w}_m]$ , then

$$\mathbf{W}^\top \mathbf{W} = \begin{bmatrix} \mathbf{w}_1^\top \mathbf{w}_1 & \mathbf{w}_1^\top \mathbf{W}_{-1} \\ \mathbf{W}_{-1}^\top \mathbf{w}_1 & \mathbf{W}_{-1}^\top \mathbf{W}_{-1} \end{bmatrix} \quad (3)$$

According to the inverse of block matrix

$$\begin{bmatrix} \mathbf{A} & \mathbf{B} \\ \mathbf{C} & \mathbf{D} \end{bmatrix}^{-1} = \begin{bmatrix} \tilde{\mathbf{A}} & \tilde{\mathbf{B}} \\ \tilde{\mathbf{C}} & \tilde{\mathbf{D}} \end{bmatrix} \quad (4)$$

where  $\tilde{\mathbf{A}} = (\mathbf{A} - \mathbf{B}\mathbf{D}^{-1}\mathbf{C})^{-1}$ ,  $\tilde{\mathbf{B}} = -(\mathbf{A} - \mathbf{B}\mathbf{D}^{-1}\mathbf{C})^{-1}\mathbf{B}\mathbf{D}^{-1}$ ,  $\tilde{\mathbf{C}} = -\mathbf{D}^{-1}\mathbf{C}(\mathbf{A} - \mathbf{B}\mathbf{D}^{-1}\mathbf{C})^{-1}$ ,  $\tilde{\mathbf{D}} = \mathbf{D}^{-1} + \mathbf{D}^{-1}\mathbf{C}(\mathbf{A} - \mathbf{B}\mathbf{D}^{-1}\mathbf{C})^{-1}\mathbf{B}\mathbf{D}^{-1}$ , we have  $(\mathbf{W}^\top \mathbf{W})_{:,1}^{-1}$  equals  $[\mathbf{a} \quad \mathbf{b}^\top]^\top$  where

$$\mathbf{a} = (\mathbf{w}_1^\top \mathbf{w}_1 - \mathbf{w}_1^\top \mathbf{W}_{-1} (\mathbf{W}_{-1}^\top \mathbf{W}_{-1})^{-1} \mathbf{W}_{-1}^\top \mathbf{w}_1)^{-1} \quad (5)$$

$$\mathbf{b} = -(\mathbf{W}_{-1}^\top \mathbf{W}_{-1})^{-1} \mathbf{W}_{-1}^\top \mathbf{w}_1 \mathbf{a} \quad (6)$$

Then

$$\mathbf{W}(\mathbf{W}^\top \mathbf{W})_{:,1}^{-1} = [\mathbf{w}_1 \quad \mathbf{W}_{-1}] \begin{bmatrix} \mathbf{a} \\ \mathbf{b} \end{bmatrix} = \frac{\mathbf{M}\mathbf{w}_1}{\mathbf{w}_1^\top \mathbf{M}\mathbf{w}_1}. \quad (7)$$

where

$$\mathbf{M} = \mathbf{I} - \mathbf{W}_{-1} (\mathbf{W}_{-1}^\top \mathbf{W}_{-1})^{-1} \mathbf{W}_{-1}^\top. \quad (8)$$

To this end, we obtain the full gradient of the objective function in Eq.(1):

$$\sum_{i=1}^n a_{i1} (a_{i1} \mathbf{w}_1 + \sum_{l=2}^m a_{il} \mathbf{w}_l - \mathbf{x}_i) + (\lambda_2 + \lambda_3) \mathbf{w}_1 - \lambda_3 \frac{\mathbf{M}\mathbf{w}_1}{\mathbf{w}_1^\top \mathbf{M}\mathbf{w}_1} + \rho(\mathbf{w}_1 - \tilde{\mathbf{w}}_1) + \mathbf{u}. \quad (9)$$

Setting the gradient to zero, we get

$$\left(\sum_{i=1}^n a_{i1}^2 + \lambda_2 + \lambda_3 + \rho\right)\mathbf{I} - \lambda_3\mathbf{M}/(\mathbf{w}_1^\top\mathbf{M}\mathbf{w}_1)\mathbf{w}_1 = \sum_{i=1}^n a_{i1}(\mathbf{x}_i - \sum_{l=2}^m a_{il}\mathbf{w}_l) - \mathbf{u} + \rho\tilde{\mathbf{w}}_1. \quad (10)$$

Let  $\gamma = \mathbf{w}_1^\top\mathbf{M}\mathbf{w}_1$ ,  $c = \sum_{i=1}^n a_{i1}^2 + \lambda_2 + \lambda_3 + \rho$ ,  $\mathbf{b} = \sum_{i=1}^n a_{i1}(\mathbf{x}_i - \sum_{l=2}^m a_{il}\mathbf{w}_l) - \mathbf{u} + \rho\tilde{\mathbf{w}}_1$ , then  $(c\mathbf{I} - \frac{\lambda_3}{\gamma}\mathbf{M})\mathbf{w}_1 = \mathbf{b}$  and  $\mathbf{w}_1 = (c\mathbf{I} - \frac{\lambda_3}{\gamma}\mathbf{M})^{-1}\mathbf{b}$ . Let  $\mathbf{U}\Sigma\mathbf{U}^\top$  be the eigen decomposition of  $\mathbf{M}$ , we have

$$\mathbf{w}_1 = \gamma\mathbf{U}(\gamma c\mathbf{I} - \lambda_3\Sigma)^{-1}\mathbf{U}^\top\mathbf{b}. \quad (11)$$

Then

$$\begin{aligned} & \mathbf{w}_1^\top\mathbf{M}\mathbf{w}_1 \\ &= \gamma^2\mathbf{b}^\top\mathbf{U}(\gamma c\mathbf{I} - \lambda_3\Sigma)^{-1}\mathbf{U}^\top\mathbf{U}\Sigma\mathbf{U}^\top\mathbf{U}(\gamma c\mathbf{I} - \lambda_3\Sigma)^{-1}\mathbf{U}^\top\mathbf{b} \\ &= \gamma^2\mathbf{b}^\top\mathbf{U}(\gamma c\mathbf{I} - \lambda_3\Sigma)^{-1}\Sigma(\gamma c\mathbf{I} - \lambda_3\Sigma)^{-1}\mathbf{U}^\top\mathbf{b} \\ &= \gamma^2\sum_{s=1}^d \frac{(\mathbf{U}^\top\mathbf{b})_s^2\Sigma_{ss}}{(rc - \lambda_3\Sigma_{ss})^2} = \gamma \end{aligned} \quad (12)$$

The matrix  $\mathbf{A} = \mathbf{W}_{-1}(\mathbf{W}_{-1}^\top\mathbf{W}_{-1})^{-1}\mathbf{W}_{-1}^\top$  is idempotent, i.e.,  $\mathbf{A}\mathbf{A} = \mathbf{A}$ , and its rank is  $m - 1$ . According to the property of idempotent matrix, the first  $m - 1$  eigenvalues of  $\mathbf{A}$  equal to one and the rest equal to zero. Thereafter, the first  $m - 1$  eigenvalues of  $\mathbf{M} = \mathbf{I} - \mathbf{A}$  equal to zero and the rest equal to one. Based on this property, Eq.(12) can be simplified as

$$\gamma\sum_{s=m}^d \frac{(\mathbf{U}^\top\mathbf{b})_s^2}{(rc - \lambda_3)^2} = 1 \quad (13)$$

After simplification, it is a quadratic function where  $\gamma$  has a closed form solution. Then we plug the solution of  $\gamma$  into Eq.(11) to get the solution of  $\mathbf{w}_1$ .

## 2 Proofs

### 2.1 Proof of Equation (7) in the Main Paper

*Proof.* Let  $\mathbf{V}\mathbf{\Pi}\mathbf{V}^\top$  be the eigen-decomposition of the Gram matrix  $\mathbf{G} = \mathbf{W}^\top\mathbf{W}$ , where  $[\mathbf{v}_1, \dots, \mathbf{v}_m]$  are the eigenvectors and  $\pi_1, \dots, \pi_m$  are the eigenvalues. Then  $\mathbf{G} - \mathbf{I} = \mathbf{V}(\mathbf{\Pi} - \mathbf{I})\mathbf{V}^\top = \sum_{j=1}^m (\pi_j - 1)\mathbf{v}_j\mathbf{v}_j^\top$ . By Cauchy-Schwarz inequality, we have  $\|\mathbf{v}_j\mathbf{v}_j^\top\|_1 \leq (\mathbf{v}_j^\top\mathbf{v}_j) \cdot m = m$ . Thus,

$$\|\mathbf{G} - \mathbf{I}\|_1 = \left\| \sum_{j=1}^m (\pi_j - 1)\mathbf{v}_j\mathbf{v}_j^\top \right\|_1 \leq \left\| \sum_{j=1}^m |\pi_j - 1| \|\mathbf{v}_j\mathbf{v}_j^\top\|_1 \right\| \leq \left\| \sum_{j=1}^m |\pi_j - 1| m \right\| = m\mathcal{C}(\mathbf{W})$$

□

### 2.2 Proof of Lemma 1 in the Main Paper

*Proof.* Let  $\mathcal{U} = \{u : (\mathbf{x}, \mathbf{y}) \rightarrow \|\mathbf{W}(\mathbf{x} - \mathbf{y})\|_2^2\}$  be the set of hypothesis  $u(\mathbf{x}, \mathbf{y}) = \|\mathbf{W}(\mathbf{x} - \mathbf{y})\|_2^2$ , and  $\mathcal{R}(\mathcal{U})$  be the Rademacher complexity (1) of  $\mathcal{U}$  which is defined as:

$$\mathcal{R}(\mathcal{U}) = \mathbb{E}_{S_N, \sigma} \sup_{u \in \mathcal{U}} \frac{1}{n} \sum_{n=1}^N \sigma_n \|\mathbf{W}(\mathbf{x}_n - \mathbf{y}_n)\|_2^2,$$

where  $S_N = ((\mathbf{x}_1, \mathbf{y}_1, t_1), (\mathbf{x}_2, \mathbf{y}_2, t_2), \dots, (\mathbf{x}_N, \mathbf{y}_N, t_N))$  are the training examples,  $\sigma_n \in \{-1, 1\}$  are the Rademacher variables, and  $\sigma = (\sigma_1, \sigma_2, \dots, \sigma_N)$ .

Lemma 3 shows that the generalization error can be bounded using the Rademacher complexity. Its proof is adapted from (1). Readers only need to notice  $x + 1$  is an upper bound of  $\log(1 + \exp(x))$  for  $x > 0$ .

**Lemma 3.** *With probability at least  $1 - \delta$ , we have*

$$L(u) - \hat{L}(u) \leq 2\mathcal{R}(\mathcal{U}) + \sup_{\mathbf{x}, \mathbf{y}, \mathbf{W}' \in \mathcal{W}} (\|\mathbf{W}'(\mathbf{x} - \mathbf{y})\|_2^2 + 1) \sqrt{\frac{2\log(1/\delta)}{N}}. \quad (14)$$

We then bound  $\mathcal{R}(\mathcal{U})$  and  $\sup_{\mathbf{x}, \mathbf{y}, \mathbf{W}' \in \mathcal{W}} \|\mathbf{W}'(\mathbf{x} - \mathbf{y})\|_2^2$ . The result is in the following lemma.

**Lemma 4.** *Suppose  $\sup_{(\mathbf{x}, \mathbf{y})} \|\mathbf{x} - \mathbf{y}\|_2 \leq B_0$ , then we have*

$$\mathcal{R}(\mathcal{U}) \leq \frac{2B_0^2\sqrt{m}}{\sqrt{N}}(\tilde{\mathcal{C}}(\mathcal{W}) + 1),$$

and

$$\sup_{\mathbf{x}, \mathbf{y}, \mathbf{W}' \in \mathcal{W}} \|\mathbf{W}'(\mathbf{x} - \mathbf{y})\|_2^2 \leq (\tilde{\mathcal{C}}(\mathcal{W}) + m)B_0^2$$

*Proof.* We first give bound on  $\mathcal{R}(\mathcal{U})$ . Let  $\mathcal{R}(\mathcal{S}) = \{s : (\mathbf{x}, \mathbf{y}) \rightarrow \sum_{j=1}^m |\langle \mathbf{w}_j, \mathbf{x} - \mathbf{y} \rangle|, \mathbf{W} \in \mathcal{W}\}$  be the set of hypothesis  $s(\mathbf{x}, \mathbf{y}) = \sum_{j=1}^m |\langle \mathbf{w}_j, \mathbf{x} - \mathbf{y} \rangle|$ . Denote  $|\langle \mathbf{w}_j, \mathbf{x}_n - \mathbf{y}_n \rangle| = \langle \mathbf{w}_j, a_{n,j}(\mathbf{x}_n - \mathbf{y}_n) \rangle$ , where  $a_{n,j} \in \{-1, 1\}$ . Then

$$\mathcal{R}(\mathcal{S}) = \mathbb{E}_{S_N, \sigma} \sup_{\mathbf{W} \in \mathcal{W}} \frac{1}{N} \sum_{n=1}^N \sigma_n \sum_{j=1}^m \langle \mathbf{w}_j, a_{n,j}(\mathbf{x}_n - \mathbf{y}_n) \rangle.$$

We first bound  $\mathcal{R}(\mathcal{S})$ .

$$\begin{aligned} \mathcal{R}(\mathcal{S}) &= \mathbb{E}_{S_N, \sigma} \sup_{\mathbf{W} \in \mathcal{W}} \frac{1}{N} \sum_{j=1}^m \langle \mathbf{w}_j, \sum_{n=1}^N \sigma_n a_{n,j}(\mathbf{x}_n - \mathbf{y}_n) \rangle \\ &= \mathbb{E}_{S_N, \sigma} \sup_{\mathbf{W} \in \mathcal{W}} \frac{1}{N} \langle \sum_{j=1}^m \mathbf{w}_j, \sum_{n=1}^N \sigma_n a_{n,j}(\mathbf{x}_n - \mathbf{y}_n) \rangle \\ &\leq \mathbb{E}_{S_N, \sigma} \sup_{\mathbf{W} \in \mathcal{W}} \frac{1}{N} \left\| \sum_{j=1}^m \mathbf{w}_j \right\|_2 \left\| \sum_{n=1}^N \sigma_n a_{n,j}(\mathbf{x}_n - \mathbf{y}_n) \right\|_2 \\ &= \mathbb{E}_{S_N, \sigma} \sup_{\mathbf{W} \in \mathcal{W}} \frac{1}{N} \sqrt{\left\langle \sum_{j=1}^m \mathbf{w}_j, \sum_{j=1}^m \mathbf{w}_j \right\rangle} \sqrt{\left\langle \sum_{n=1}^N \sigma_n a_{n,j}(\mathbf{x}_n - \mathbf{y}_n), \sum_{n=1}^N \sigma_n a_{n,j}(\mathbf{x}_n - \mathbf{y}_n) \right\rangle} \end{aligned} \quad (15)$$

Applying Jensen's inequality to Eq.(15), we have

$$\mathcal{R}(\mathcal{S}) \leq \mathbb{E}_{S_N} \sup_{\mathbf{W} \in \mathcal{W}} \frac{1}{N} \sqrt{\sum_{j,k=1}^m |\langle \mathbf{w}_j, \mathbf{w}_k \rangle|} \sqrt{\mathbb{E}_\sigma \left\langle \sum_{n=1}^N \sigma_n a_{n,j}(\mathbf{x}_n - \mathbf{y}_n), \sum_{n=1}^N \sigma_n a_{n,j}(\mathbf{x}_n - \mathbf{y}_n) \right\rangle} \quad (16)$$

Combining Eq.(16) with the inequality  $\sum_{j,k=1}^m |\langle \mathbf{w}_j, \mathbf{w}_k \rangle - \delta_{j,k}| \leq m\mathcal{C}(\mathbf{W})$ , we have

$$\begin{aligned} \mathcal{R}(\mathcal{S}) &\leq \mathbb{E}_{S_N} \sup_{\mathbf{W} \in \mathcal{W}} \frac{1}{N} \sqrt{m\mathcal{C}(\mathbf{W}) + m} \sqrt{\sum_{n=1}^N \|\mathbf{x}_n - \mathbf{y}_n\|_2} \\ &\leq \frac{\sqrt{m}}{\sqrt{N}} \sup_{\mathbf{W} \in \mathcal{W}} \sqrt{(\mathcal{C}(\mathbf{W}) + 1)B_0} \end{aligned}$$

Let  $\mathbf{w}$  denote any column vector of  $\mathbf{W} \in \mathcal{W}$  and  $\mathbf{x}$  denote any data example. According to the composition property of Rademacher complexity (Theorem 12 in (1)), we have

$$\begin{aligned} \mathcal{R}(\mathcal{U}) &\leq 2 \sup_{\mathbf{w}, \mathbf{x}} \langle \mathbf{w}, \mathbf{x} \rangle \mathcal{R}(\mathcal{S}) \\ &\leq 2 \sup_{\mathbf{w}} \|\mathbf{w}\|_2 B_0 \mathcal{R}(\mathcal{S}) \\ &\leq 2 \sup_{\mathbf{w}} \|\mathbf{w}\|_1 B_0 \mathcal{R}(\mathcal{S}) \\ &\leq 2 \sup_{\mathbf{W}' \in \mathcal{W}} \|\mathbf{W}'\|_1 B_0 \mathcal{R}(\mathcal{S}) \\ &\leq \frac{2B_0^2\sqrt{m}}{\sqrt{N}} \sup_{\mathbf{W}' \in \mathcal{W}} \|\mathbf{W}'\|_1 \sqrt{\tilde{\mathcal{C}}(\mathcal{W}) + 1} \end{aligned}$$

Next we give bound on  $\sup_{\mathbf{x}, \mathbf{y}, \mathbf{W}' \in \mathcal{W}} \|\mathbf{W}'(\mathbf{x} - \mathbf{y})\|_2^2$ .

$$\begin{aligned} \sup_{\mathbf{x}, \mathbf{y}, \mathbf{W}' \in \mathcal{W}} \|\mathbf{W}'(\mathbf{x} - \mathbf{y})\|_2^2 &\leq \sup_{\mathbf{W}' \in \mathcal{W}} \sum_{j=1}^m \langle \mathbf{w}'_j, \mathbf{w}'_j \rangle \sup_{(\mathbf{x}, \mathbf{y})} \|\mathbf{x} - \mathbf{y}\|_2^2 \\ &= \sup_{\mathbf{W}' \in \mathcal{W}} \text{tr}(\mathbf{W}'^\top \mathbf{W}') \sup_{(\mathbf{x}, \mathbf{y})} \|\mathbf{x} - \mathbf{y}\|_2^2 \\ &\leq (\tilde{\mathcal{C}}(\mathcal{W}) + m) B_0^2 \end{aligned}$$

□

Combining Lemma 4 with Lemma 3, we complete the proof of Lemma 1. □

### 2.3 Proof of Lemma 2 in the Main Paper

*Proof.* The function  $g(x) = x - \log(x + 1)$  is decreasing on  $(-1, 0]$ , increasing on  $[0, \infty)$ ,  $g(0) = 0$ , and  $g(-t) > g(t)$  for  $\forall 0 \leq t < 1$ . We have

$$\begin{aligned} \Omega_{\text{Id}}(\mathbf{W}) &= \text{tr}(\mathbf{W}^\top \mathbf{W}) - \log \det(\mathbf{W}^\top \mathbf{W}) - m \\ &= \sum_{j=1}^m g(\pi_j - 1) \\ &\geq \sum_{j=1}^m g(|\pi_j - 1|) \\ &\geq g\left(\frac{1}{m} \sum_{j=1}^m |\pi_j - 1|\right) m \\ &= g(\mathcal{C}(\mathbf{W})/m) m \end{aligned}$$

The first inequality is due to  $g(-t) > g(t)$ , and the second inequality can be attained by Jensen's inequality. Finally we have

$$g(\mathcal{C}(\mathbf{W})/m) m \leq \Omega_{\text{Id}}(\mathbf{W}).$$

Thus, we have

$$\mathcal{C}(\mathbf{W}) \leq g^{-1}(\Omega_{\text{Id}}(\mathbf{W})/m) m.$$

□

## References

- [1] Peter L Bartlett and Shahar Mendelson. Rademacher and gaussian complexities: Risk bounds and structural results. *Journal of Machine Learning Research*, 3:463–482, 2003.
